# Supplementary material for: Exploring Controls on Solute Export Mechanisms for Major Nutrients in Anthropogenically Impacted Catchments in Southern Germany under Climate Change
Source: Copernicus journal article supplement (doi:10.5194/egusphere-2025-1588), 2025-04-10
Supplement: Supplementary file [file egusphere-2025-1588-AC2-supplement.pdf]

## Supplements to Detailed Response to Reviewer

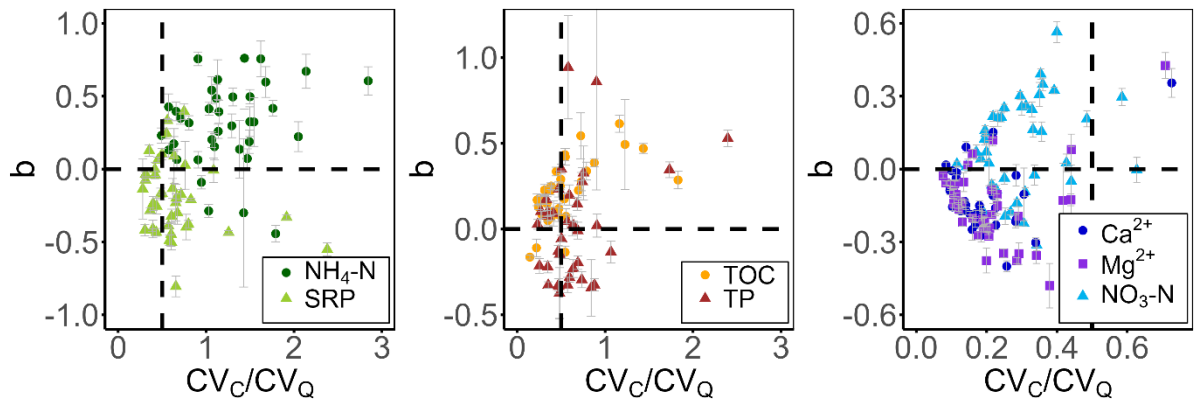

**Figure 2:** Illustration of the SEM for  $\blacktriangle$  SRP,  $\bullet$   $\text{NH}_4\text{-N}$ ,  $\blacktriangle$  TP,  $\bullet$  TOC,  $\blacktriangle$   $\text{NO}_3\text{-N}$ ,  $\bullet$   $\text{Ca}^{2+}$  and  $\blacksquare$   $\text{Mg}^{2+}$  clusters, with error bars representing  $\pm 1$  standard error. Clusters represent temporal-dynamic solutes (green, left), short-term stable solutes (yellow/brown, middle), and long-term stable solutes (blue/violet, right). The vertical line separates chemostatic (left) from chemodynamic behaviour (right), while the horizontal line distinguishes enrichment (top) from dilution (bottom) patterns.

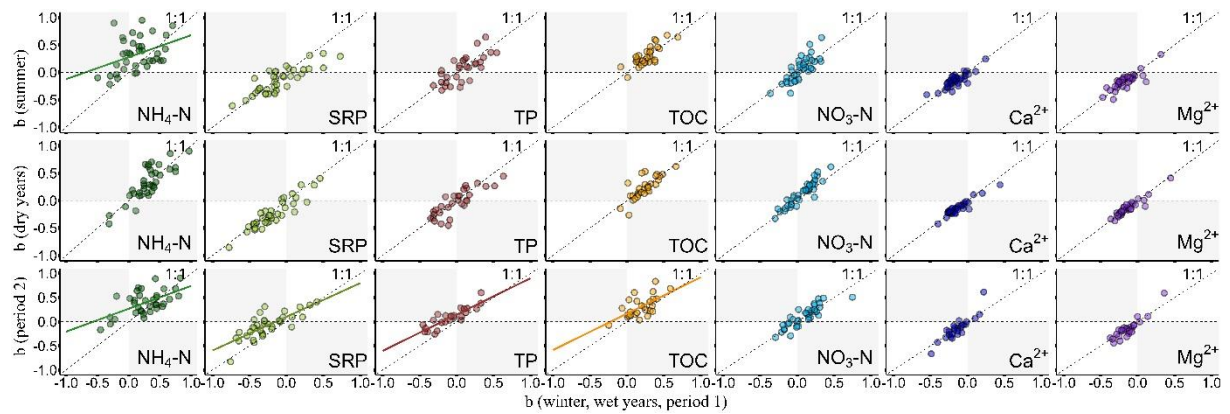

**Figure 1:** Differences in solute export mechanisms for  $\text{NO}_3\text{-N}$ ,  $\text{NH}_4\text{-N}$ , SRP, TP, TOC, Ca, and Mg in response to temporal changes. Differences in solute export mechanisms: (top) summer and winter, (middle) dry years and wet years and (bottom) Period 2 and Period 1. Dots represent individual catchments.  $b$  = solute export mechanisms ( $b < 0$ : dilution;  $b > 0$ : enrichment behaviour). Regression lines included for significant temporal differences ( $p < 0.05$  and  $p < 0.1$  for TOC). Points above the 1:1 line indicate an increase in enrichment or a decrease in dilution behaviour, whereas points below the 1:1 line indicate a less pronounced enrichment or an increased dilution export pattern respectively. The gray areas indicate a directional shift in solute export.

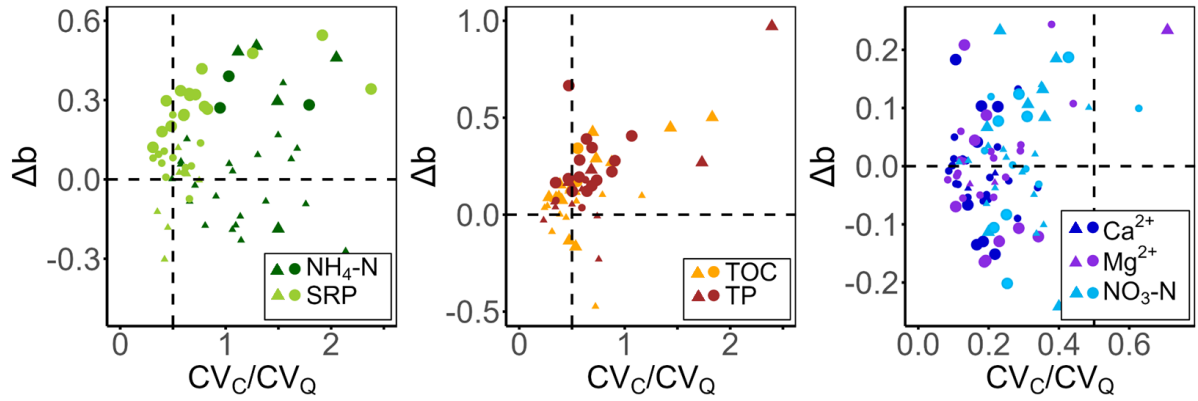

**Figure 4:** Change in cQ-relationships ( $\Delta b$ ) for SRP,  $\text{NH}_4\text{-N}$ , TP, TOC,  $\text{NO}_3\text{-N}$ ,  $\text{Mg}^{2+}$ , and  $\text{Ca}^{2+}$  explained by climate change. Positive  $\Delta b$  values indicate an increasing enrichment behaviour.  $\blacktriangle$  represent catchments exhibiting enrichment behaviour in Period 1, while  $\bullet$  indicate catchments with dilution behaviour in Period 1. Significant differences in slope  $b$  between Period 1 and Period 2 are highlighted by larger symbol sizes.

**Table 2:** Descriptive statistics of mean solute concentrations ( $C_{\text{mean}}$ ,  $\text{mg L}^{-1}$ ) and associated standard deviations ( $C_{\text{mean}} \pm \text{SD}$ ) across all catchments. Interannual Trends in interannual solute concentrations are summarized as fraction of catchments (%) showing positive trends ( $C_{\text{increase}}$ ), negative trends ( $C_{\text{decrease}}$ ), or no significant trends (NC – no change). Trends were assessed using linear regression models (concentration vs. time), with p-values derived from F-tests and adjusted for multiple comparisons within each catchment dataset using the Benjamini–Hochberg procedure ( $p < 0.05$ ). The number of catchments included in the analysis is denoted by  $n$ .

|                                                        |                           | $\text{NH}_4\text{-N}$ ( $n=40$ ) | SRP ( $n=40$ )  | TP ( $n=38$ )   | TOC ( $n=33$ )  | $\text{NO}_3\text{-N}$ ( $n=40$ ) | $\text{Ca}^{2+}$ ( $n=40$ ) | $\text{Mg}^{2+}$ ( $n=40$ ) |
|--------------------------------------------------------|---------------------------|-----------------------------------|-----------------|-----------------|-----------------|-----------------------------------|-----------------------------|-----------------------------|
| $C_{\text{mean}} \pm \text{sd}$ ( $\text{mg L}^{-1}$ ) |                           | $0.15 \pm 0.11$                   | $0.11 \pm 0.05$ | $0.19 \pm 0.09$ | $4.77 \pm 1.45$ | $4.04 \pm 1.81$                   | $66.06 \pm 41.48$           | $17.08 \pm 12.71$           |
| Fraction of catchments                                 | $C_{\text{increase}}$ (%) | 2.5                               | 0.0             | 2.6             | 15.2            | 2.5                               | 15.0                        | 12.5                        |
|                                                        | $C_{\text{decrease}}$ (%) | 57.5                              | 67.5            | 60.5            | 6.1             | 72.5                              | 5.0                         | 2.5                         |
|                                                        | NC (%)                    | 40.0                              | 32.5            | 36.8            | 78.8            | 25.0                              | 80.0                        | 85.0                        |

**Table 3: Pearson Correlation test between catchment descriptors of different categories and slope b showing influence of catchment characteristics on SEM: highly significant positive correlation (++ p<0.01), significant positive correlation (+ p<0.05), significant negative correlation (- p<0.05), highly significant negative correlation (-- p<0.01). Moderate (grey, r>0.3) and strong (dark grey, r>0.5) effect sizes were observed, indicating varying strengths of association. Differences between correlations in Period 1 and 2 are determined by using ANCOVA (p<0.05) showing increased impact of control due to climate change ( $\Delta$ ), decreased impact of control due to climate change ( $\nabla$ ), no change (O). Pearson Correlation is corrected by Benjamini-Hochberg correction.**

| Category         | Control          | NH <sub>4</sub> -N | SRP           | TP            | TOC           | NO <sub>3</sub> -N | Ca <sup>2+</sup> | Mg <sup>2+</sup> |
|------------------|------------------|--------------------|---------------|---------------|---------------|--------------------|------------------|------------------|
| Hydrology        | Qmean            |                    |               |               |               |                    |                  |                  |
|                  | Qmedian          |                    |               |               |               |                    |                  |                  |
|                  | log(Qmean)       |                    |               | +/ $\nabla$   |               |                    |                  |                  |
|                  | q                |                    |               |               |               |                    |                  |                  |
| Topography       | altitude         |                    |               |               |               |                    |                  |                  |
|                  | A                |                    |               |               |               |                    |                  |                  |
| Climate          | P                | - / O              |               | ++ / $\Delta$ |               | - / O              |                  |                  |
|                  | ET               |                    | ++ / $\Delta$ | ++ / $\Delta$ | ++ / $\nabla$ | - / O              |                  |                  |
|                  | PET              |                    |               |               |               |                    |                  |                  |
|                  | dMI              | - / $\Delta$       |               | ++ / $\Delta$ |               | -- / O             |                  |                  |
|                  | ET/P             |                    |               | - / O         |               |                    |                  |                  |
|                  | PET/P            |                    |               | - / O         |               |                    |                  |                  |
| Land use         | arable land      |                    |               |               |               | + / O              |                  |                  |
|                  | pastures         |                    |               |               |               |                    |                  |                  |
|                  | forest           |                    |               |               |               |                    |                  |                  |
|                  | urban area       |                    |               |               |               | - / O              |                  |                  |
| Geology and soil | sandstone        |                    |               |               |               |                    | + / $\nabla$     | + / O            |
|                  | carbonate rock   |                    |               | + / $\Delta$  |               |                    |                  |                  |
|                  | crystalline rock |                    |               |               |               |                    |                  |                  |
|                  | clay rock        |                    | - / $\Delta$  | - / $\nabla$  |               |                    |                  |                  |
|                  | sediments        |                    |               |               |               |                    |                  |                  |
|                  | loess sediments  |                    |               |               |               |                    |                  |                  |
|                  | soil moisture    | - / $\Delta$       |               | ++ / $\Delta$ |               | - / O              |                  |                  |
